# Supplementary material for: Galectin-4 Is Involved in the Structural Changes of Glycosphingolipid Glycans in Poorly Differentiated Gastric Cancer Cells with High Metastatic Potential
Source: MDPI journal article supplement (doi:10.3390/ijms241512305), 2023-08-01
Supplement: s1 [file s1]

## Supplemental Materials

**Table S1.** The list of abbreviations of *N*-glycans from NUGC4 cells.

| m/z (theoretical)<br>of BOA-glycan (Na <sup>+</sup> ) | glycan composition | abbreviation |
|-------------------------------------------------------|--------------------|--------------|
| 1022.380                                              | H2N2F1             | M2F          |
| 1184.433                                              | H3N2F1             | M3F          |
| 1200.428                                              | H4N2               | M4           |
| 1362.481                                              | H5N2               | M5           |
| 1524.534                                              | H6N2               | M6           |
| 1686.587                                              | H7N2               | M7           |
| 1848.639                                              | H8N2               | M8           |
| 2010.692                                              | H9N2               | M9           |
| 2117.777                                              | H5N5F1             | G2F+GN       |
| 2263.835                                              | H5N5F2             | G2F2+GN      |
| 2336.851                                              | H6N6               | G3+GN        |
| 2409.893                                              | H5N5F3             | G2F3+GN      |
| 2482.909                                              | H6N6F1             | G3F+GN       |
| 2571.946                                              | H6N5F3             | G3F3         |
| 2628.967                                              | H6N6F2             | G3F2+GN      |
| 2701.984                                              | H7N7               | G4+GN        |
| 2775.025                                              | H6N6F3             | G3F3+GN      |
| 2848.041                                              | H7N7F1             | G4F+GN       |
| 2921.083                                              | H6N6F4             | G3F4+GN      |
| 2994.099                                              | H7N7F2             | G4F2+GN      |
| 3140.157                                              | H7N7F3             | G4F3+GN      |
| 3286.215                                              | H7N7F4             | G4F4+GN      |
| 3432.273                                              | H7N7F5             | G4F5+GN      |
| 3505.289                                              | H8N8F3             | G5F3+GN      |
| 3651.347                                              | H8N8F4             | G5F4+GN      |
| 3797.405                                              | H8N8F5             | G5F5+GN      |

The left column shows the *m/z* of BOA-labeled *N*-glycans (Na<sup>+</sup>), glycan composition (H, hexose; N, *N*-acetylhexosamine; F, fucose), and the abbreviations of *N*-glycans.

positive

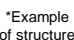

**Figure S1.** Detailed structure of *N*-glycans in NUGC4 cells identified by MALDI-MS<sup>2</sup>. MS<sup>2</sup> sequencing at *m/z* 2118, 2264, 2410, 2483, 2702, 2848, 2994, 3140, 3286, and 3505 of Fig.1 were acquired in positive ion mode. The presence of bisecting GlcNAc was identified by the fragment ion peak of D ion-221 (bisect structural marker) [18, 19]. The compositions and structures of *N*-glycans are shown in the MS spectra.

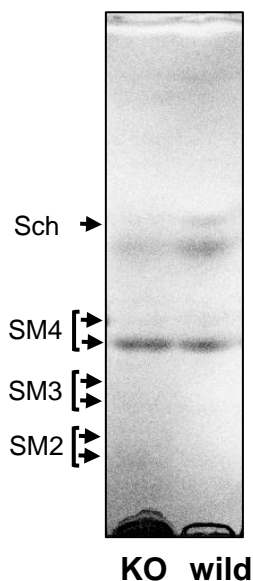

**Figure S2.** HPTLC analysis of acidic lipids from NUGC4 cells. Acidic lipids, containing sulfated glycosphingolipids (GSLs) are indicated by their abbreviations: galactosylceramide sulfate (SM4), lactosylceramide sulfate (SM3), ganglioside monosulfate (SM2), and cholesterol 3-sulfate (Sch). The TLC bands of sulfated lipids were visualized using Azure A staining.

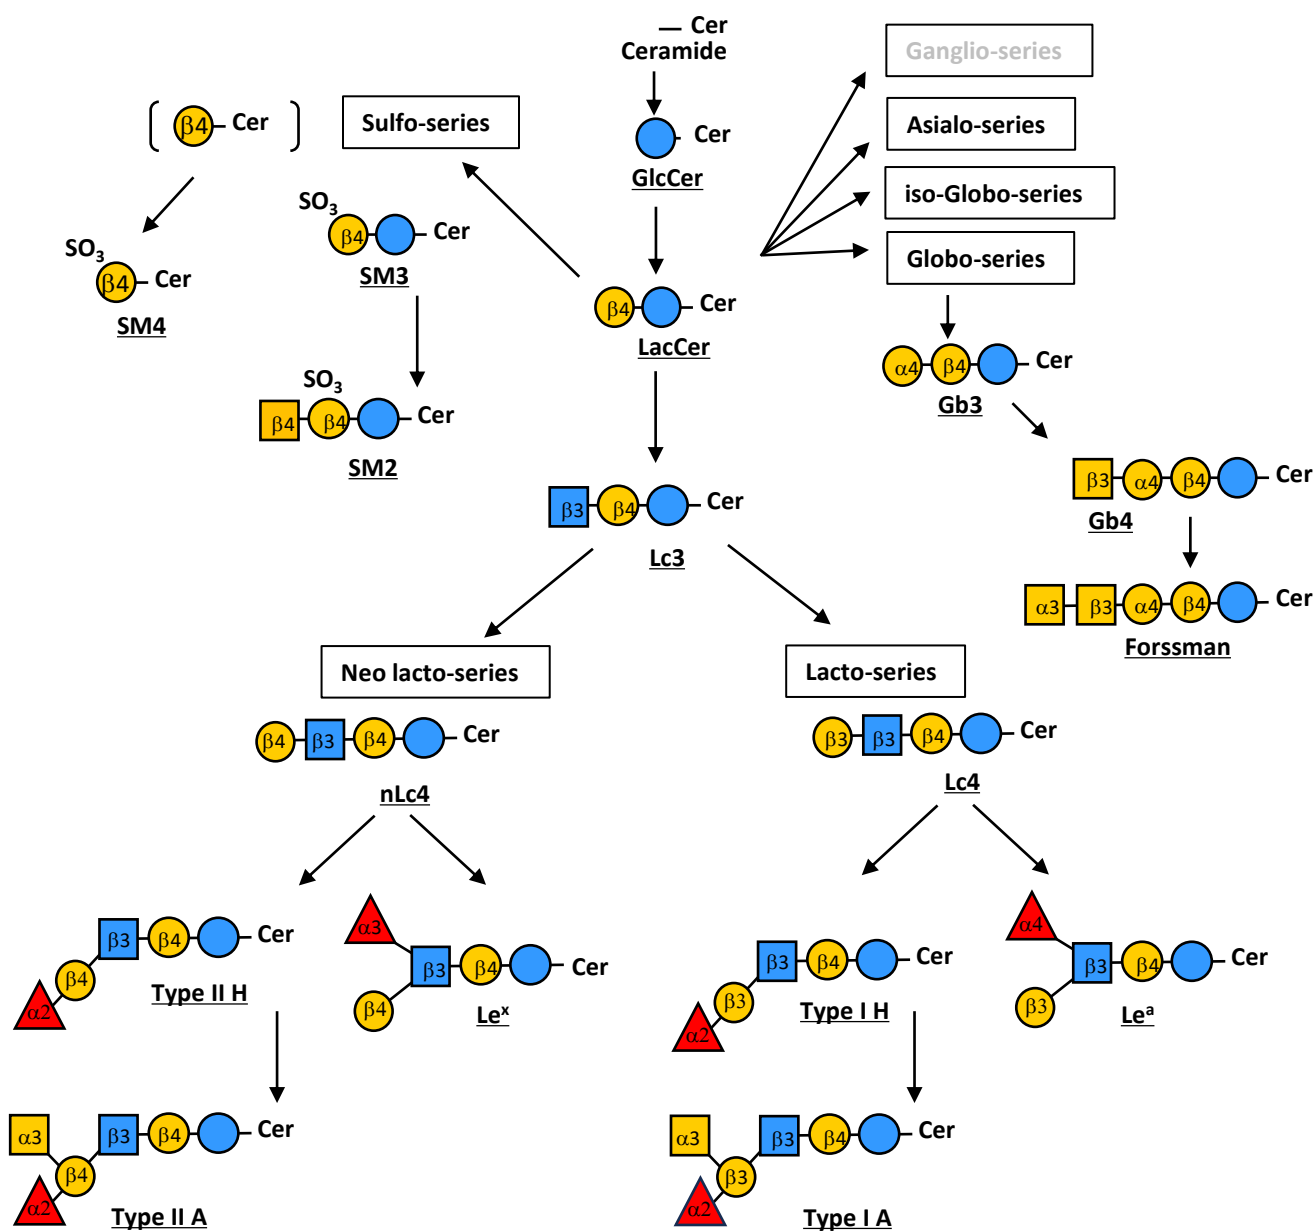

**Figure S3.** Possible GSL biosynthetic pathways in NUGC4 cells. The GSLs are indicated by their abbreviations.

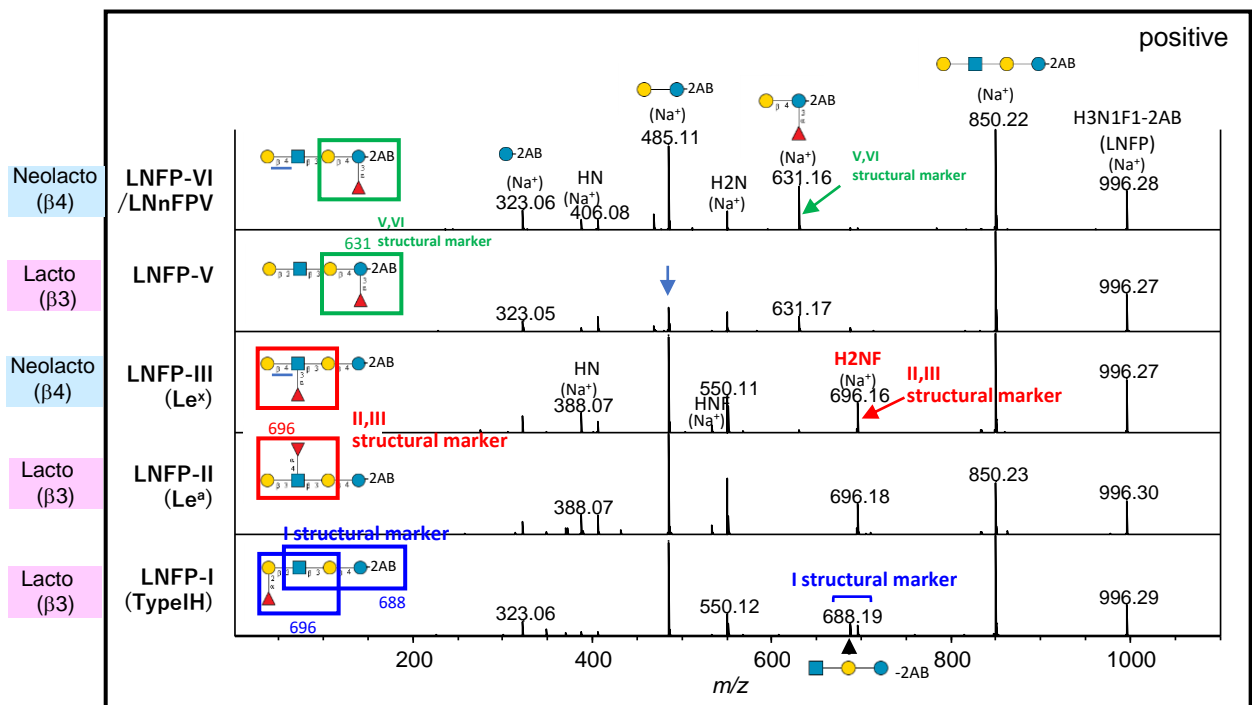

**Figure S4.** MALDI-MS<sup>n</sup> analysis of five standards (STDs) of H3N1F1 (Lacto-N-fucopentaose, LNFP I–III, and V–VI) with 2-aminobenzamide (2AB) labeling. Reference MALDI-MS<sup>2</sup> spectra for matching with NUGC4 samples were acquired in positive ion mode. LNFP I (Type IH, Lc-type), LNFP II (Le<sup>a</sup>, Lc-type), LNFP III (Le<sup>x</sup>, nLc-type), LNFP V (Lc-type), and LNFP VI/LNnFP V (nLc-type). The structures of LNFP I–VI and structural markers of the fragment peaks are shown in the MS<sup>2</sup> spectra.

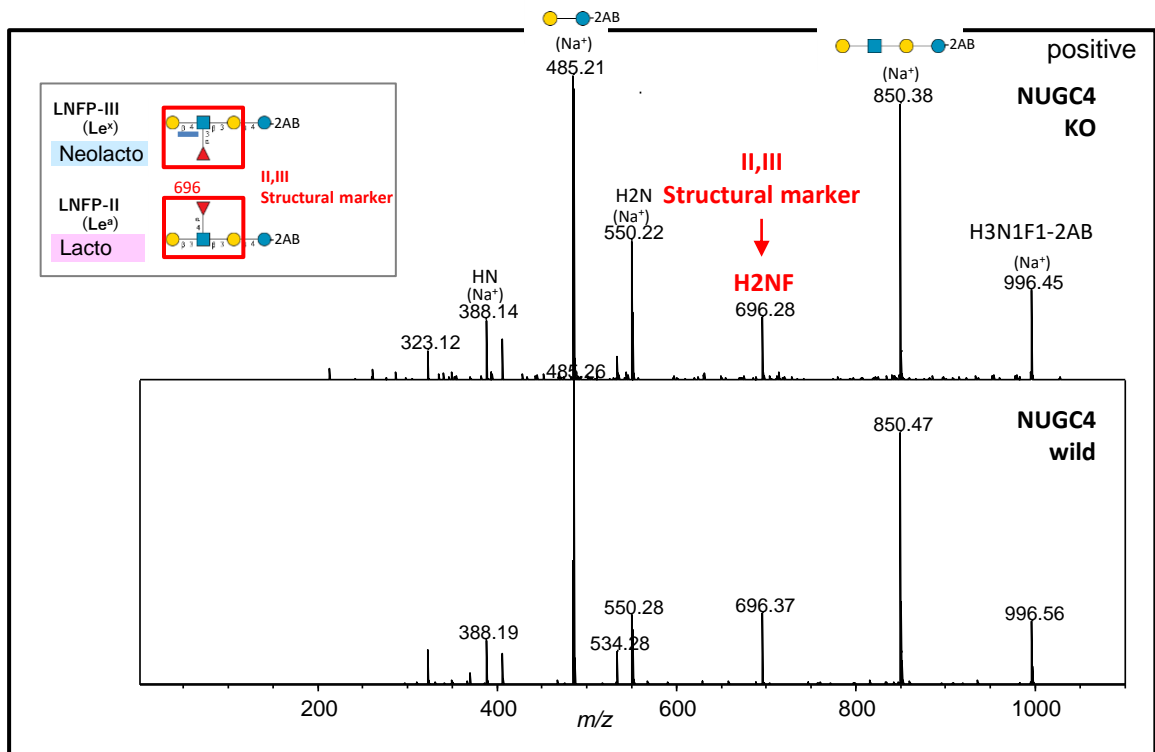

**Figure S5.** MALDI-MS<sup>2</sup> analysis of the GSL glycans, H3N1F1 ( $m/z$  996), from the wild-type NUGC4 (lower) and galectin-4 KO (upper) with 2AB-labeling. MALDI-MS<sup>2</sup> was acquired in positive ion mode. The structures of LNFP II and III and the structural markers of the fragment peaks are shown in the MS<sup>2</sup> spectra.

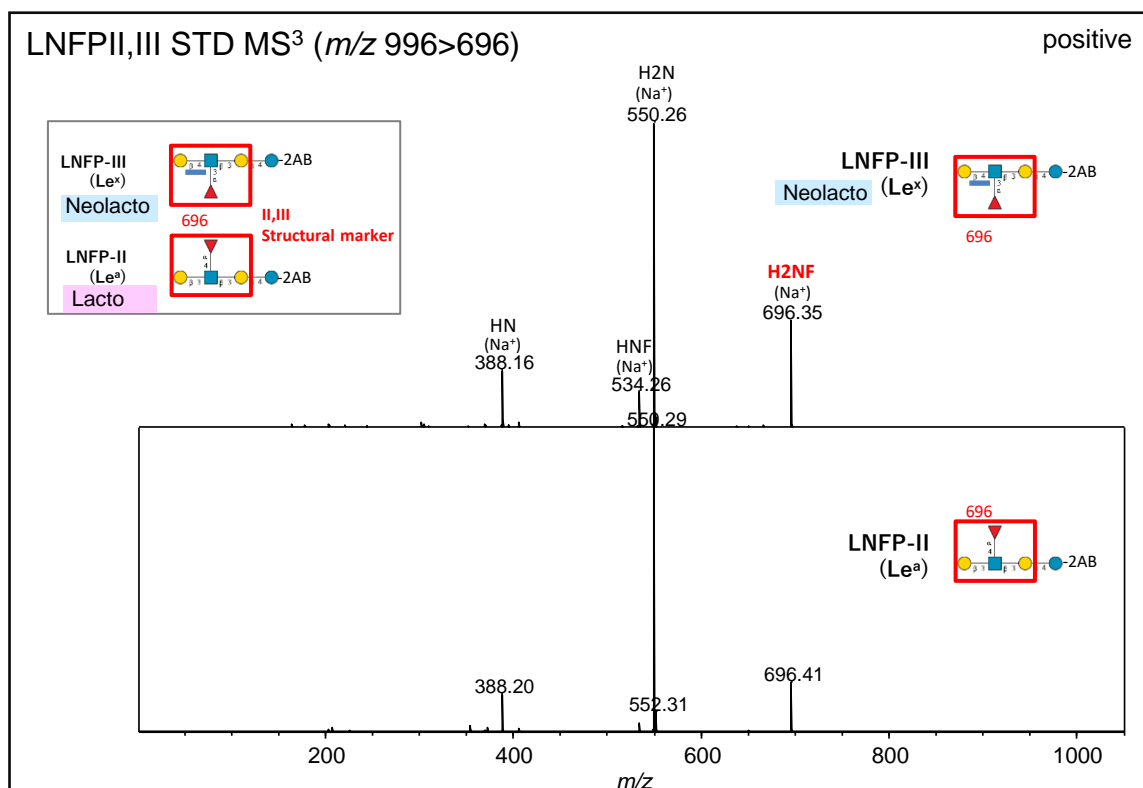

**Figure S6.** MALDI-MS<sup>3</sup> analysis ( $m/z$  996 > 696) of the STDs of LNFP II (lower) and LNFP III (upper) with 2AB-labeling. MALDI-MS<sup>3</sup> spectra were acquired in positive ion mode. The structures of LNFP II and III and the structural markers of the fragment peaks are shown in the MS<sup>2</sup> spectra.

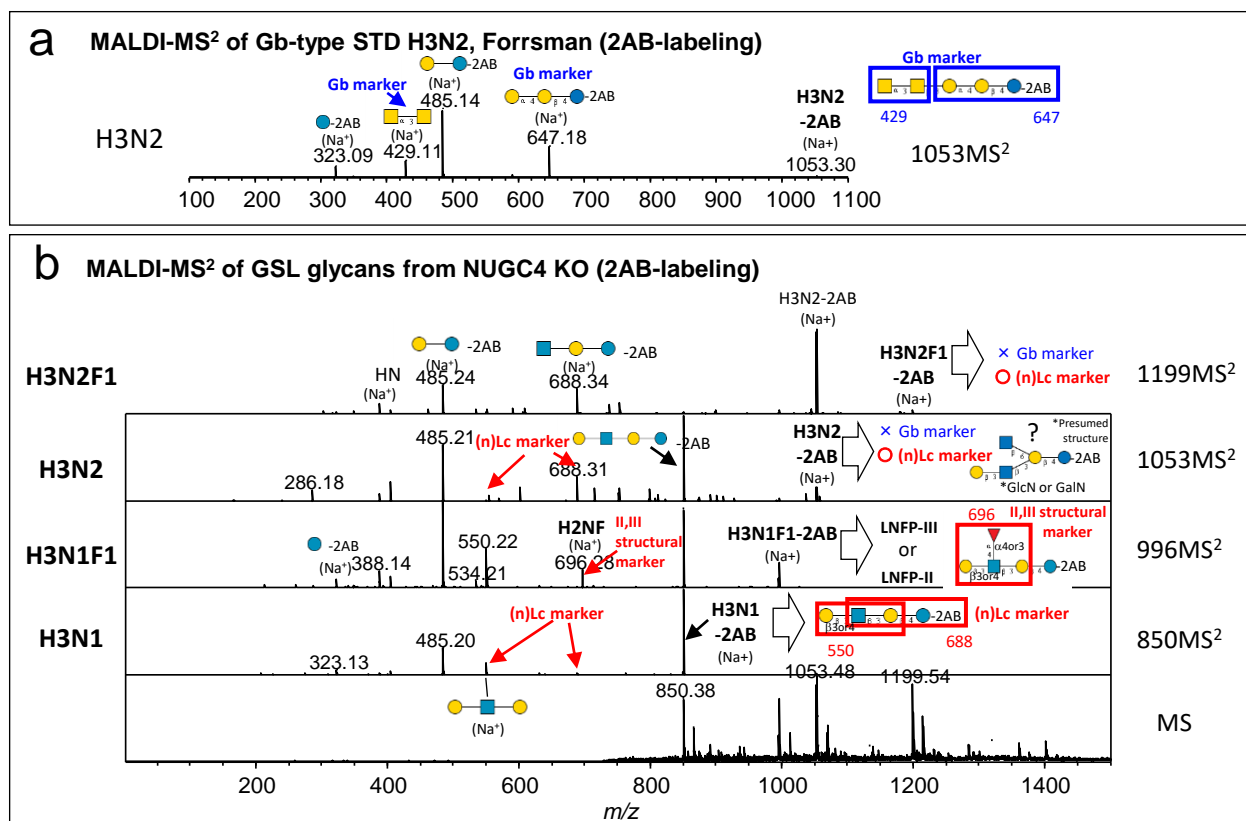

**Figure S7.** (a) Reference MALDI-MS<sup>2</sup> data for STD H3N2 (Forssman), a globo (Gb)-type glycan, with 2AB-labeling. MALDI-MS<sup>2</sup> spectra were acquired in positive ion mode. The structures and structural markers (Gb markers) of the fragment peaks are shown in the MS<sup>2</sup> spectra. (b) MALDI-MS<sup>2</sup> analysis of GSL glycans H3N1, H3N1F1, H3N2, and H3N2F1 from NUGC4 galectin-4 KO with 2AB labeling. MALDI-MS<sup>2</sup> spectra were acquired in positive ion mode. Based on the MS data, MS<sup>2</sup> data of H3N1 (*m/z* 850), H3N1F1 (*m/z* 996), H3N2 (*m/z* 1053), and H3N2F1 (*m/z* 1199) were obtained. The composition, presumed structure, and structural markers (Lacto/neoLacto, (n)Lc marker) of the fragment peaks are shown in the MS<sup>2</sup> spectra.

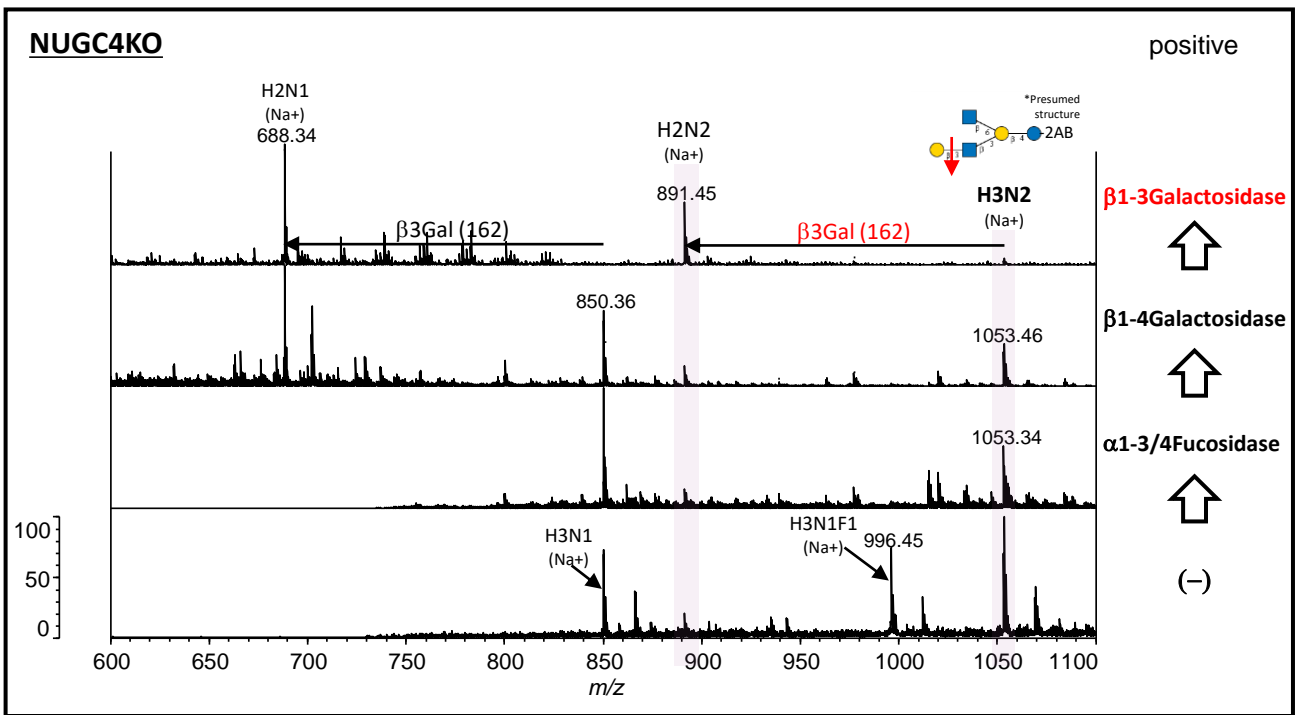

**Figure S8.** The detailed structure of the GSL glycan H3N2 ( $m/z$  1053) in NUGC4 galectin-4 KO cells was identified using glycosidase and MS analysis. From the bottom, the MALDI-TOF MS spectra of GSL glycans without glycosidase, with  $\alpha$ 1-3/4Fucosidase, with  $\beta$ 1-4Galactosidase after  $\alpha$ 1-3/4Fucosidase, with  $\beta$ 1-3Galactosidase after  $\beta$ 1-4Galactosidase, and  $\alpha$ 1-3/4Fucosidase. MALDI-TOF MS spectra of GSL glycans with 2AB-labeling were acquired in positive ion mode. The compositions and presumed structures of the glycans are shown in the MS spectra.





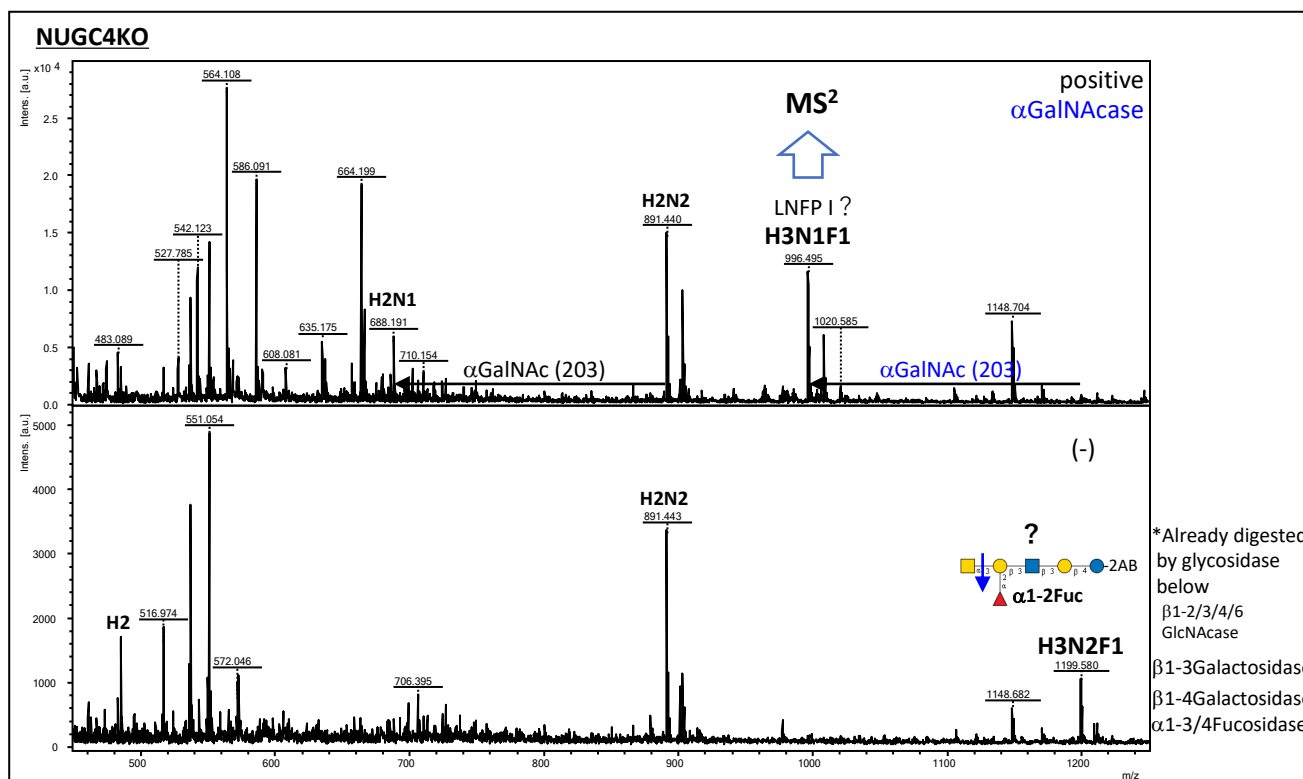

**Figure S10.** The detailed structure of the GSL glycan H3N2F1 ( $m/z$  1199) in NUGC4 KO cells was identified using glycosidase and MS analysis. MALDI-TOF MS spectra of glycans digested with (upper) or without (lower)  $\alpha$ GalNAcase. Glycan was digested with  $\beta$ -*N*-acetyl-glucosaminidase,  $\beta$ 1-3Galactosidase,  $\beta$ 1-4Galactosidase, and  $\alpha$ 1-3/4Fucosidase prior to  $\alpha$ GalNAcase digestion. MALDI-TOF MS spectra were acquired in positive ion mode. The compositions and presumed structures of the glycans are shown in the MS spectra.

### NUGC4KO

MS2 pattern of H3N1F1 ( $m/z$  996) was matched with LNFP I  
→ H3N2F1 of KO was found to be blood group antigen Type IA (lacto type)

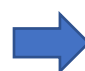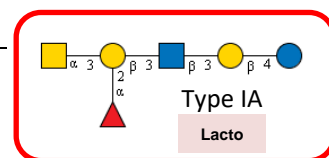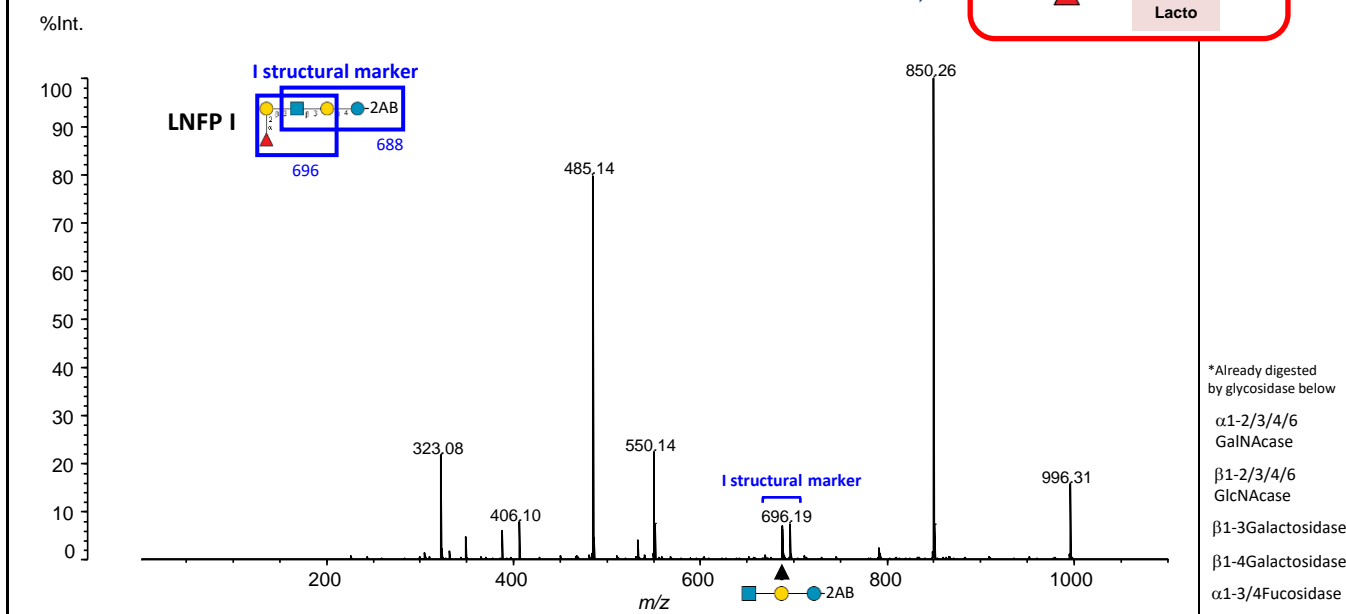

**Figure S11.** MALDI-MS<sup>2</sup> analysis of the GSL glycan, H3N1F1 ( $m/z$  996), was digested with  $\alpha$ GalNAcase in the NUGC4 KO with 2AB-labeling. MALDI-MS<sup>2</sup> was acquired in positive ion mode. The GSL glycan structures and structural markers of the fragment peaks are shown in the MS<sup>2</sup> spectra.

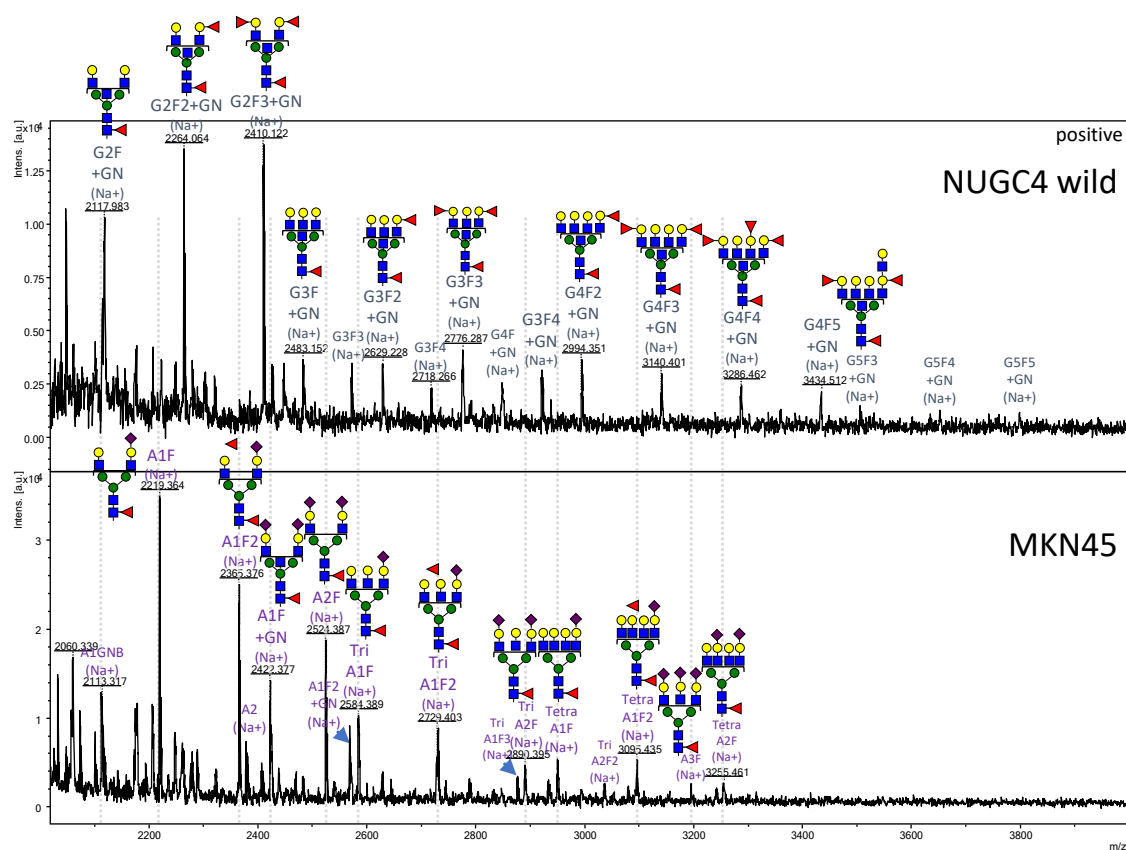

**Figure S12.** Analysis of the *N*-glycans of the membrane protein from NUGC4 and MKN45 cells by MALDI-TOF MS (BOA-labeling). MALDI-TOF MS spectra ( $m/z$  2020 to 4000) in wild-type NUGC4 (upper) and MKN45 (lower), were acquired in positive ion mode.
